# Supplementary material for: Intravesicale onabotulinumtoxine-A-injecties bij therapieresistente kinderen met een niet-neurogene overactieve blaas
Source: Springer Nature journal article supplement (doi:10.1007/s13629-022-00360-3), 2022-06-30
Supplement: MOESM1 [file 23227418]

## Appendix A

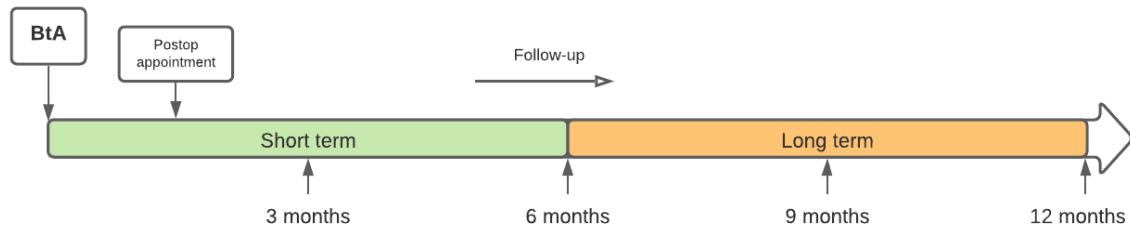

Tijdslijn van follow-up periode na BTX-A behandeling.

## Appendix B

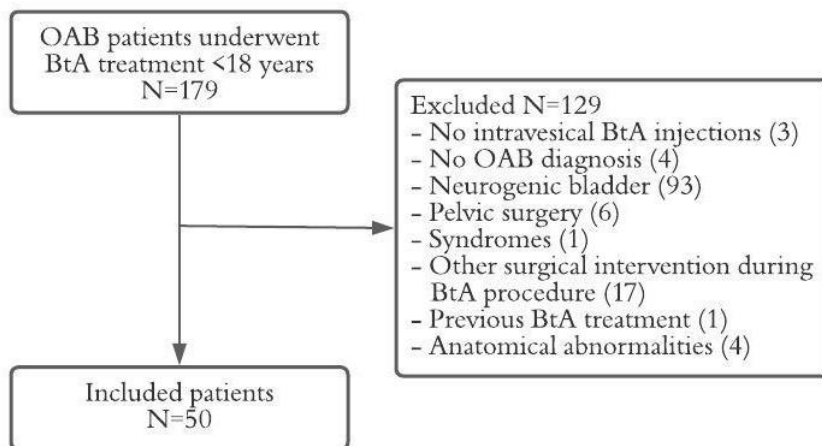

Flowchart van in- en exclusie van kinderen die BTX-A behandeling ontvingen vanaf 2011.
